# Supplementary material
Source: PubMed Central journal article supplement (PMC4396709)
Supplement: NIHMS594182-supplement-2.pdf [file NIHMS594182-supplement-2.pdf]

**Supplemental Figure 1.** CD8<sup>+</sup> T-cells and PD-L1 expressions were co-localized in the tumor microenvironment. TEGVAX treated B16 tumor was harvested and stained with anti-CD8 and anti-PD-L1 conjugates. DAPI was used as counterstain. Co-localization was demonstrated with the merging of the FITC (CD8) and Cy3 (PD-L1) conjugates.
